# Supplementary material for: Surface induces different crystal structures in a room temperature switchable spin crossover compound
Source: Royal Society of Chemistry journal article supplement (doi:10.1039/c5dt03712c), 2015-11-02
Supplement: c5dt03712c1.pdf [file c5dt03712c1.pdf]

## Surface induces different crystal structures in room temperature switchable spin crossover compound

### Electronic Supplementary Information (ESI)

#### Characterization of thermally inert crystallites I

Below 295 K thermally inert crystallites (I) have the same morphology of the bulk phase crystallites and show the same Raman spectrum, however when heated up the transition temperature of the bulk material, they do not switch, even at 350 K (Fig S1a,b). The structure of these different crystals has been determined, using synchrotron X-ray diffraction, manually selecting them from a drop-casted sample.

Single crystal structure has been determined above and below the transition temperature of bulk material. The crystal packing is completely different from the known crystal form, with different space group ( $I 2/c$ ) and a significantly smaller volume (~15% smaller at 100K). The unit cell contains four  $[\text{Fe}(\text{L})_2]$  moieties and additional eight “free” ligand molecules. Iron ions lie on crystallographic twofold axis, this implies that the asymmetric unit contains half complex molecule and one neutral L, stacked to form a heterodimeric aggregate (Fig. S1c). Each free ligand is forming H-bonds, which involve the donor tetrazole ring N1-H atom, pointing to the acceptor N2 atom (2.85 Å) of the coordinated tetrazolate moiety of each L in the  $\text{Fe}(\text{L})_2$  complex. These H-bonded free ligands form strong stacking interactions to neighbor ligand molecules,. This is leading to a very compact crystal packing, without solvent accessible voids.  $\text{Fe}^{\text{II}}$  sphere geometry reveals that  $\text{Fe}^{\text{II}}$  is in a low spin status in the whole temperature range explored (100-350K).

Thermally inert crystal form has no cavities and this result is compatible with insensitivity to alcohol exposure and better temperature resistance. Structural model obtained at 100K, 250K, 330K and 350K show the same iron coordination sphere, with bond lengths and angles consistent with low spin values found for bulk crystals below 300K<sup>1</sup>. Essential crystal and refinement data are reported in Table 1SI. Full iron coordination sphere angles and bond lengths are reported in Table 2SI. Figure S1 shows an optical micrograph of the spin transition of the powder, in a zone particularly rich of thermally inert crystals (panels a and b – inert crystals encircled in b) and a picture of the crystal structure of thermally inert crystals (panel c).

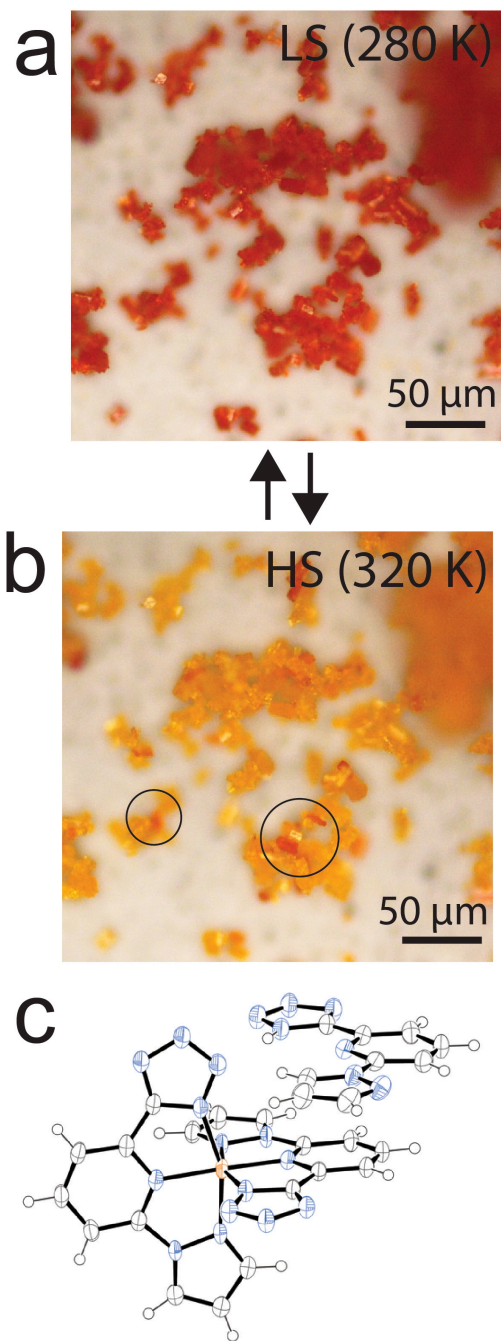

**Figure S1.** Optical micrograph of spin transition in the powder of **1**. The circles highlight some thermally inert crystallites that do not switch. The percentage of these crystals is normally < 1%, here we selected a zone exceptionally rich of these crystals. Images recorded at a) 280 K and b) 320 K. c)  $[\text{Fe}(\text{L})_2]$  molecular assembly in thermally inert crystals, obtained by X-ray diffraction at 100 K. A free (not coordinated to iron) L molecule is present. Displacement ellipsoids are drawn at 50% probability.

Structural models for data collected at 100 K have been deposited on The Cambridge Crystallographic Data Centre (access code is CCDC-1055435).

### Synthesis thermally inert crystals

As it was already noted in the main article the powder of **1** contains a small percentage (we estimated < 2 %) of crystallites, which do not exhibit the spin transition, there we named these thermally inert crystals.

It was also possible to obtain thermally inert crystals as an exclusive convergent product of a chemical reaction. The chemical equation is shown in Fig. S2

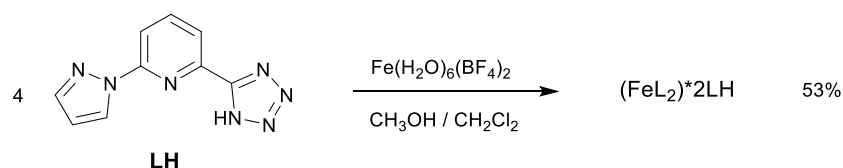

**Figure S2.** Synthesis of thermally inert crystals

LH (0.158 g, 0.74 mmol, 4 eq) and  $\text{Fe}(\text{H}_2\text{O})_6(\text{BF}_4)_2$  (62.5 mg, 0.185 mmol, 1 eq) were added to a Ar-degassed solution of  $\text{CH}_2\text{Cl}_2$  (25 ml) and MeOH (25 ml). The orange solution was stirred at 35°C. After 10 minutes time the stirring was stopped, the solution was filtered and the solvent was allowed to evaporate slowly over night. The next morning, the red crystals were collected by filtration and allowed to dry under an atmosphere of nitrogen. Yield:

Elemental analysis: calc. for **I** ( $\text{C}_{36}\text{H}_{26}\text{FeN}_{28} = [\text{Fe}(\text{C}_9\text{H}_6\text{N}_7) \cdot 2(\text{C}_9\text{H}_7\text{N}_7)]$ ) C, 47.69; H, 2.89; N, 43.26; found C, 47.89; H, 2.88; N, 43.21.

### Magnetic characterization of thermally inert crystals

Using an oven-setup for the high temperature range of the susceptibility measurement of unswitchable crystallites revealed a diamagnetic character until about 450K. Then the compound is gradually and irreversibly changing to the high spin state (see Fig. S3). This may be caused by the decomposition of the determined molecular structure of complex **I** due to thermal instability of the (H-bonded) N-rich ligand subunits. Structural models for data collected at 100 K have been deposited on The Cambridge Crystallographic Data Centre (access code CCDC-1055435).

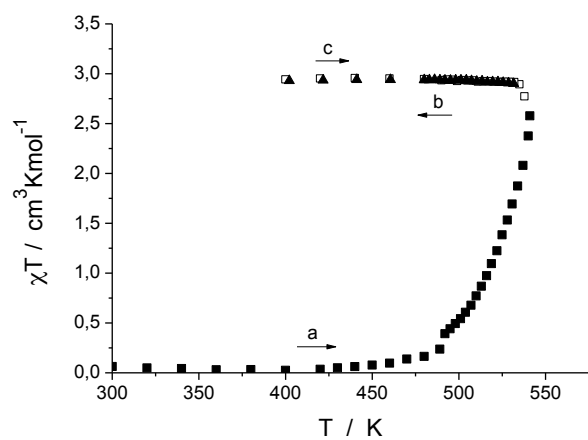

**Figure S3** Magnetic properties of **I** ( $B = 0.1$  T). Temperature dependence of the  $\chi T$  product: a) black squares: heating from 300 to 540 K; b) white squares: cooling to 400 K; c) black triangles: heating to 530 K.

**Table 1SI.** Crystal data and structure refinement for inactive crystals (**I**).

|                                                                                                                                                       | Inactive form ( <b>I</b> )                                                                        |
|-------------------------------------------------------------------------------------------------------------------------------------------------------|---------------------------------------------------------------------------------------------------|
| Moiety Formula                                                                                                                                        | C <sub>18</sub> H <sub>12</sub> FeN <sub>14</sub> · 2C <sub>9</sub> H <sub>7</sub> N <sub>7</sub> |
| Empirical Formula                                                                                                                                     | C <sub>36</sub> H <sub>26</sub> FeN <sub>28</sub>                                                 |
| Formula weight (Da)                                                                                                                                   | 906.70                                                                                            |
| Temperature (K)                                                                                                                                       | 100(2)                                                                                            |
| Wavelength (Å)                                                                                                                                        | 0.800                                                                                             |
| Crystal system                                                                                                                                        | Monoclinic                                                                                        |
| Space Group                                                                                                                                           | <i>I</i> 2/ <i>c</i>                                                                              |
| <i>a</i> (Å)                                                                                                                                          | 16.407(3)                                                                                         |
| <i>b</i> (Å)                                                                                                                                          | 9.768(2)                                                                                          |
| <i>c</i> (Å)                                                                                                                                          | 23.226(5)                                                                                         |
| $\alpha$ (°)                                                                                                                                          | 90                                                                                                |
| $\beta$ (°)                                                                                                                                           | 90.32(3)                                                                                          |
| $\gamma$ (°)                                                                                                                                          | 90                                                                                                |
| <i>V</i> (Å <sup>3</sup> )                                                                                                                            | 3722.3(13)                                                                                        |
| <i>Z</i>                                                                                                                                              | 4                                                                                                 |
| $\rho$ (g·cm <sup>-3</sup> )                                                                                                                          | 1.618                                                                                             |
| <i>F</i> (000)                                                                                                                                        | 1856                                                                                              |
| $\mu$ (mm <sup>-1</sup> )                                                                                                                             | 0.654                                                                                             |
| $\theta$ min,max (°)                                                                                                                                  | 2.0, 28.1                                                                                         |
| Resolution (Å)                                                                                                                                        | 0.85                                                                                              |
| Total refl. collectd                                                                                                                                  | 10920                                                                                             |
| Independent refl.                                                                                                                                     | 3051                                                                                              |
| Obs. Refl. [ <i>F</i> <sub>o</sub> >4 $\sigma$ ( <i>F</i> <sub>o</sub> )]                                                                             | 2545                                                                                              |
| <i>I</i> / $\sigma$ ( <i>I</i> ) (all data)                                                                                                           | 12.9                                                                                              |
| <i>I</i> / $\sigma$ ( <i>I</i> ) (max resltn)                                                                                                         | 9.3                                                                                               |
| Completeness (all data)                                                                                                                               | 0.95                                                                                              |
| Completeness (max resltn)                                                                                                                             | 0.92                                                                                              |
| Rmerge (all data)                                                                                                                                     | 0.071                                                                                             |
| Rmerge (max resltn,)                                                                                                                                  | 0.118                                                                                             |
| Multiplicity (all data)                                                                                                                               | 3.3                                                                                               |
| Multiplicity (max resltn)                                                                                                                             | 3.1                                                                                               |
| Data/restraint/parameters                                                                                                                             | 3051/0/308                                                                                        |
| Goof                                                                                                                                                  | 1.024                                                                                             |
| <i>R</i> <sub>1</sub> <sup>a</sup> [ <i>I</i> >2.0 $\sigma$ ( <i>I</i> )], <i>wR</i> <sub>2</sub> <sup>a</sup> [ <i>I</i> >2.0 $\sigma$ ( <i>I</i> )] | 0.0423, 0.1096                                                                                    |
| <i>R</i> <sub>1</sub> <sup>a</sup> (all data), <i>wR</i> <sub>2</sub> <sup>a</sup> (all data)                                                         | 0.0532, 0.1175                                                                                    |

$$^a R_1 = \frac{\sum |F_o| - |F_c|}{\sum |F_o|}, wR_2 = \left[ \frac{\sum w (F_o^2 - F_c^2)^2}{\sum w (F_o^2)^2} \right]^{1/2}.$$

**Table 2SI.** Bond lengths (Å) and angles (°) in iron coordination sphere.

|             | Dried Crystals <sup>1</sup> | Dried Crystals ( <b>1</b> ) <sup>1</sup> | Inactive form ( <b>I</b> ) |
|-------------|-----------------------------|------------------------------------------|----------------------------|
| T (K)       | 180                         | 300                                      | 100                        |
| Fe-N1       | 1.968(4)                    | 1.978(1)                                 | 1.969(2)                   |
| Fe-N7       | 1.949(4)                    | 1.962(1)                                 | 1.950(2)                   |
| Fe-N5       | 1.916(3)                    | 1.912(1)                                 | 1.909(2)                   |
| Fe-N12      | 1.918(3)                    | 1.912(1)                                 | 1.909(2)                   |
| Fe-N8       | 1.971(4)                    | 1.980(1)                                 | 1.969(2)                   |
| Fe-N14      | 1.959(4)                    | 1.971(1)                                 | 1.950(2)                   |
| N1-Fe-N7    | 160.04(14)                  | 159.75(5)                                | 160.30(8)                  |
| N1-Fe-N5    | 80.08(15)                   | 79.85(5)                                 | 79.95(9)                   |
| N1-Fe-N12   | 101.77(15)                  | 103.86(5)                                | 103.52(9)                  |
| N1-Fe-N8    | 92.20(17)                   | 92.41(5)                                 | 94.81(13)                  |
| N1-Fe-N14   | 92.34(16)                   | 92.78(5)                                 | 90.23(9)                   |
| N7-Fe-N5    | 79.98(15)                   | 79.92(5)                                 | 80.36(9)                   |
| N7-Fe-N12   | 98.19(14)                   | 96.36(5)                                 | 96.10(9)                   |
| N7-Fe-N8    | 91.27(16)                   | 92.30(5)                                 | 90.23(9)                   |
| N7-Fe-N14   | 91.14(16)                   | 89.52(5)                                 | 91.39(13)                  |
| N5-Fe-N12   | 177.48(16)                  | 176.22(5)                                | 174.99(13)                 |
| N5-Fe-N8    | 102.26(14)                  | 101.00(5)                                | 103.52(9)                  |
| N5-Fe-N14   | 97.88(15)                   | 99.07(5)                                 | 96.11(9)                   |
| N12-Fe-N8   | 79.45(15)                   | 79.71(5)                                 | 79.94(9)                   |
| N12-Fe-N14  | 80.39(16)                   | 80.15(5)                                 | 80.37(9)                   |
| N8-Fe-N14   | 159.83(14)                  | 159.86(5)                                | 160.30(8)                  |
| Colour      | Deep Red                    | Deep Red                                 | Bright Red                 |
| Spin Status | <b>LS</b>                   | <b>LS</b>                                | <b>LS</b>                  |
| CCDC        | 956141                      | 1055429                                  | 1055435                    |

**Table 3.** Calculated Raman frequencies  $E$  ( $\text{cm}^{-1}$ ) and activities  $A$  ( $\text{\AA}^4/\text{amu}$ ) of LS and HS states compared with the experimental ones at 280 K (LS) and 328 K (HS) reported within brackets. The assignments are based on the main contributions by the stretching (s), bending (b), and torsional (t) modes of **1** with **I** = pyridine, **II** = pyrazole, and **III** = tetrazole. The contributions given by  $\text{Fe}^{\text{II}}$  are evidenced.

| $E^{\text{LS}}$ ( $E^{280\text{K}}$ ) | $A^{\text{LS}}$ | assignment <sup>LS</sup>              | $E^{\text{HS}}$ ( $E^{328\text{K}}$ ) | $A^{\text{HS}}$ | assignment <sup>HS</sup>                        |
|---------------------------------------|-----------------|---------------------------------------|---------------------------------------|-----------------|-------------------------------------------------|
| 1620(1618)                            | 0.315           | $s^{\text{I}}$                        | 1617(1615)                            | 0.345           | $s^{\text{I}}$                                  |
| 1570(1572)                            | 0.285           | $s^{\text{I}}$                        | 1580(1579)                            | 0.170           | $s^{\text{I}}$                                  |
| 1536(1533)                            | 0.460           | $s^{\text{I,II}}$                     | 1531(1534)                            | 0.460           | $s^{\text{I,II}}$                               |
| 1513(1524)                            | 0.633           | $s^{\text{I,III}}$                    | 1515(1524)                            | 0.630           | $s^{\text{I,II}}, b^{\text{I,III}}$             |
| 1490(1488)                            | 0.397           | $s^{\text{I,II}}$                     | 1482(1477)                            | 0.306           | $s^{\text{I,III}}$                              |
| 1411(1413)                            | 0.213           | $s^{\text{I,III}}$                    | 1414(1411)                            | 0.273           | $s^{\text{I,III}}$                              |
| 1372(1385)                            | 0.950           | $s^{\text{I}}, b^{\text{I-II,I-III}}$ | 1376(1395)                            | 0.419           | $s^{\text{I}}, b^{\text{I-II,I-III}}$           |
| 1349(1355)                            | 0.425           | $b^{\text{I-Fe-III}}$                 | 1349(1353)                            | 0.390           | $b^{\text{I-Fe-III}}$                           |
| 1292(1302)                            | 0.219           | $s^{\text{III}}$                      | 1293(1313)                            | 0.166           | $s^{\text{III}}$                                |
| 1211(1209)                            | 0.418           | $b^{\text{III}}$                      | 1207(1206)                            | 0.184           | $s^{\text{II}}$                                 |
| 1173(1161)                            | 0.135           | $b^{\text{I}}, s^{\text{III}}$        | 1171(1187)                            | 0.094           | $s^{\text{II}}, b^{\text{I}}$                   |
| 1154(1143)                            | 0.188           | $b^{\text{I}}$                        | 1131(1146)                            | 0.199           | $b^{\text{I}}, s^{\text{III}}$                  |
| 1129(1112)                            | 0.302           | $b^{\text{II}}$                       | 1130(1102)                            | 0.199           | $s^{\text{Fe-I,II}}, b^{\text{I}}$              |
| 1061(1063)                            | 0.133           | $b^{\text{III}}$                      | 1065(1062)                            | 0.124           | $b^{\text{III}}, s^{\text{III}}$                |
| 1037(1035)                            | 0.693           | $b^{\text{I}}, s^{\text{Fe-I}}$       | 1012(1012)                            | 1.000           | $s^{\text{Fe-I}}, b^{\text{I}}$                 |
| 960(965)                              | 0.119           | $b^{\text{I}}$                        | 954(965)                              | 0.123           | $s^{\text{Fe-III}}, b^{\text{III}}$             |
| 680(684)                              | 0.166           | $s^{\text{Fe-I}}, b^{\text{I}}$       | 666(667)                              | 0.482           | $s^{\text{Fe-I}}, b^{\text{I}}$                 |
| 490(501)                              | 0.131           | $t^{\text{I}}$                        | 460(472)                              | 0.152           | $s^{\text{Fe-I}}, b^{\text{I-Fe-II, I-Fe-III}}$ |
| 388(392)                              | 0.118           | $b^{\text{I-Fe-II, I-Fe-III}}$        | 375(383)                              | 0.069           | $b^{\text{I-Fe-II, I-Fe-III}}$                  |
| 375(375)                              | 0.124           | $t^{\text{Fe-I, Fe-II, Fe-III}}$      | 356(358)                              | 0.093           | $s^{\text{Fe-I, Fe-II, Fe-III}}$                |
| 237(241)                              | 0.189           | $s^{\text{Fe-I, Fe-II, Fe-III}}$      | 270(263)                              | 0.156           | $t^{\text{I}}, s^{\text{Fe-I, Fe-II, Fe-III}}$  |

**Table 4.** Comparison among the electronic energies of the LS and HS states of complex **1** alone, calculated at the X-ray structures obtained at 100 K (LS) and 300 K (HS), in CH<sub>3</sub>OH, and *in vacuo*. The zero-point correction to the electronic energy (ZPE) is calculated *in vacuo* with the standard ambient conditions without scaling of the force constants.

| structure                              | E <sup>LS</sup> (au) | E <sup>HS</sup> (au) | ΔE <sup>(LS-HS)</sup> (cm <sup>-1</sup> ) |
|----------------------------------------|----------------------|----------------------|-------------------------------------------|
| X-ray                                  | -2721.28855207       | -2721.23372567       | -12033.00                                 |
| X-ray + H <sub>2</sub> O <sup>a)</sup> | -2797.54179585       | -2797.49369769       | -10556.32                                 |
| in CH <sub>3</sub> OH                  | -2721.46437530       | -2721.46617799       | 395.64                                    |
| in CH <sub>2</sub> Cl <sub>2</sub>     | -2721.45749267       | -2721.45923879       | 383.23                                    |
| <i>in vacuo</i>                        | -2721.41547754       | -2721.41754586       | 453.94                                    |
| ZPE                                    | 0.32233000           | 0.31871500           | 793.40                                    |

<sup>a)</sup>counterpoise corrected values (S. F. Boys and F. Bernardi, *Mol. Phys.*, **19** (1970) 553.)



**Table 5.** Comparison among the Natural Charges ( $\delta$ ) calculated for the LS and HS states of **1** at the X-ray geometry obtained at 100 K.

|                  | $\delta^{\text{LS}}$ | $\delta^{\text{HS}}$ | $\Delta(\delta^{\text{LS}} - \delta^{\text{HS}})$ |
|------------------|----------------------|----------------------|---------------------------------------------------|
| 2 x pyridyl-     | 0.6769               | 0.4492               | 0.2277                                            |
| 2 x diazoly-     | 0.1682               | -0.0036              | 0.1718                                            |
| 2 x tetrazolyl-  | -0.9762              | -1.1892              | 0.2130                                            |
| Fe <sup>II</sup> | 0.1311               | 0.7435               | -0.6124                                           |

**Table 6.** Comparison among the Natural Charges ( $\delta$ ) calculated for the LS and HS states of **1** at the X-ray geometries obtained at 100 K and 300 K.

| atom   | 100 K                |                      |                                                 | 300 K                |                      |                                                 |
|--------|----------------------|----------------------|-------------------------------------------------|----------------------|----------------------|-------------------------------------------------|
|        | $\delta^{\text{LS}}$ | $\delta^{\text{HS}}$ | $\Delta(\delta^{\text{LS}}-\delta^{\text{HS}})$ | $\delta^{\text{LS}}$ | $\delta^{\text{HS}}$ | $\Delta(\delta^{\text{LS}}-\delta^{\text{HS}})$ |
| C (1)  | 0.0073               | 0.0165               | -0.0092                                         | 0.0056               | 0.0147               | -0.0091                                         |
| N (2)  | -0.1616              | -0.1571              | -0.0045                                         | -0.1606              | -0.1558              | -0.0048                                         |
| N (3)  | -0.1741              | -0.2841              | 0.1100                                          | -0.1760              | -0.2860              | 0.1100                                          |
| C (4)  | 0.0351               | 0.0482               | -0.0131                                         | 0.0378               | 0.0507               | -0.0129                                         |
| C (5)  | -0.2935              | -0.2957              | 0.0022                                          | -0.2930              | -0.2953              | 0.0023                                          |
| C (6)  | 0.4190               | 0.4210               | -0.0020                                         | 0.4194               | 0.4207               | -0.0013                                         |
| N (7)  | -0.3690              | -0.4893              | 0.1203                                          | -0.3700              | -0.4894              | 0.1194                                          |
| C (8)  | 0.2319               | 0.2357               | -0.0038                                         | 0.2310               | 0.2340               | -0.0030                                         |
| C (9)  | -0.2153              | -0.2140              | -0.0013                                         | -0.2145              | -0.2131              | -0.0014                                         |
| C(10)  | -0.1409              | -0.1404              | -0.0006                                         | -0.1409              | -0.1410              | 0.0001                                          |
| C(11)  | -0.2743              | -0.2721              | -0.0022                                         | -0.2753              | -0.2731              | -0.0022                                         |
| C(12)  | 0.2555               | 0.2637               | -0.0082                                         | 0.2551               | 0.2633               | -0.0082                                         |
| N(13)  | -0.2508              | -0.3713              | 0.1204                                          | -0.2531              | -0.3730              | 0.1199                                          |
| N(14)  | -0.0838              | -0.0791              | -0.0047                                         | -0.0850              | -0.0808              | -0.0042                                         |
| N(15)  | -0.0960              | -0.0952              | -0.0008                                         | -0.0940              | -0.0932              | -0.0008                                         |
| N(16)  | -0.3131              | -0.3125              | -0.0007                                         | -0.3136              | -0.3131              | -0.0005                                         |
| Fe(17) | 0.1311               | 0.7435               | -0.6124                                         | 0.1388               | 0.7501               | -0.6113                                         |
| N(18)  | -0.2520              | -0.3713              | 0.1192                                          | -0.2517              | -0.3701              | 0.1184                                          |
| N(19)  | -0.0850              | -0.0808              | -0.0042                                         | -0.0843              | -0.0800              | -0.0043                                         |
| N(20)  | -0.0967              | -0.0961              | -0.0006                                         | -0.0964              | -0.0960              | -0.0004                                         |
| N(21)  | -0.3127              | -0.3128              | 0.0001                                          | -0.3109              | -0.3109              | 0.0000                                          |
| C(22)  | 0.2584               | 0.2662               | -0.0078                                         | 0.2547               | 0.2617               | -0.0069                                         |
| C(23)  | 0.2305               | 0.2346               | -0.0041                                         | 0.2282               | 0.2330               | -0.0048                                         |

| atom  | 100 K         |               |                                   | 300 K         |               |                                   |
|-------|---------------|---------------|-----------------------------------|---------------|---------------|-----------------------------------|
|       | $\delta^{LS}$ | $\delta^{HS}$ | $\Delta(\delta^{LS}-\delta^{HS})$ | $\delta^{LS}$ | $\delta^{HS}$ | $\Delta(\delta^{LS}-\delta^{HS})$ |
| C(1)  | 0.0073        | 0.0165        | -0.0092                           | 0.0056        | 0.0147        | -0.0091                           |
| N(24) | -0.3690       | -0.4896       | 0.1206                            | -0.3701       | -0.4906       | 0.1205                            |
| C(25) | 0.4185        | 0.4204        | -0.0019                           | 0.4212        | 0.4238        | -0.0026                           |
| C(26) | -0.2764       | -0.2747       | -0.0018                           | -0.2768       | -0.2756       | -0.0012                           |
| C(27) | -0.1423       | -0.1417       | -0.0005                           | -0.1432       | -0.1417       | -0.0015                           |
| C(28) | -0.2207       | -0.2191       | -0.0016                           | -0.2183       | -0.2170       | -0.0013                           |
| N(29) | -0.1638       | -0.1598       | -0.0040                           | -0.1629       | -0.1595       | -0.0033                           |
| N(30) | -0.1755       | -0.2854       | 0.1099                            | -0.1772       | -0.2849       | 0.1077                            |
| C(31) | 0.0433        | 0.0579        | -0.0146                           | 0.0426        | 0.0566        | -0.0140                           |
| C(32) | -0.2903       | -0.2928       | 0.0025                            | -0.2924       | -0.2948       | 0.0024                            |
| C(33) | 0.0063        | 0.0163        | -0.0100                           | 0.0056        | 0.0149        | -0.0094                           |
| H(34) | 0.2409        | 0.2398        | 0.0011                            | 0.2410        | 0.2398        | 0.0011                            |
| H(35) | 0.2245        | 0.2242        | 0.0004                            | 0.2236        | 0.2232        | 0.0004                            |
| H(36) | 0.2275        | 0.2257        | 0.0018                            | 0.2277        | 0.2258        | 0.0019                            |
| H(37) | 0.2220        | 0.2215        | 0.0004                            | 0.2220        | 0.2216        | 0.0004                            |
| H(38) | 0.2289        | 0.2284        | 0.0005                            | 0.2292        | 0.2288        | 0.0004                            |
| H(39) | 0.2173        | 0.2168        | 0.0005                            | 0.2164        | 0.2159        | 0.0004                            |
| H(40) | 0.2412        | 0.2401        | 0.0011                            | 0.2405        | 0.2395        | 0.0010                            |
| H(41) | 0.2238        | 0.2235        | 0.0004                            | 0.2242        | 0.2239        | 0.0003                            |
| H(42) | 0.2270        | 0.2251        | 0.0018                            | 0.2273        | 0.2256        | 0.0017                            |
| H(43) | 0.2213        | 0.2209        | 0.0004                            | 0.2218        | 0.2215        | 0.0004                            |
| H(44) | 0.2291        | 0.2287        | 0.0004                            | 0.2294        | 0.2290        | 0.0003                            |
| H(45) | 0.2164        | 0.2161        | 0.0004                            | 0.2172        | 0.2168        | 0.0004                            |

**Table 7.** X-ray cartesian coordinates (Å) of **1**.

| atom   | 100 K   |          |          | 300 K   |          |          |
|--------|---------|----------|----------|---------|----------|----------|
|        | x       | y        | z        | x       | y        | z        |
| C (1)  | 3.95257 | 14.00586 | 1.41526  | 3.94962 | 14.06983 | 1.45172  |
| N (2)  | 3.59343 | 13.09599 | 0.46211  | 3.60094 | 13.16270 | 0.49614  |
| N (3)  | 4.69666 | 12.61338 | -0.20038 | 4.70610 | 12.71199 | -0.17900 |
| C (4)  | 5.72924 | 13.22165 | 0.35222  | 5.73305 | 13.33531 | 0.36917  |
| C (5)  | 5.31861 | 14.08520 | 1.35838  | 5.30779 | 14.19212 | 1.39013  |
| C (6)  | 2.35658 | 12.54726 | 0.09796  | 2.37618 | 12.59779 | 0.13447  |
| N (7)  | 2.50760 | 11.58299 | -0.81122 | 2.53778 | 11.65860 | -0.79497 |
| C (8)  | 1.42926 | 10.90461 | -1.26753 | 1.47406 | 10.95876 | -1.24925 |
| C (9)  | 0.15974 | 11.19418 | -0.79852 | 0.20237 | 11.20632 | -0.76294 |
| C (10) | 0.01401 | 12.22425 | 0.12068  | 0.04803 | 12.21668 | 0.17751  |
| C (11) | 1.11494 | 12.92530 | 0.58797  | 1.13097 | 12.93133 | 0.64475  |
| C (12) | 1.86408 | 9.92907  | -2.24658 | 1.91260 | 10.01159 | -2.25640 |
| N (13) | 3.18496 | 9.90548  | -2.52245 | 3.23102 | 10.00594 | -2.53391 |
| N (14) | 3.34324 | 8.93783  | -3.43567 | 3.39823 | 9.06971  | -3.47670 |
| N (15) | 2.15158 | 8.42195  | -3.70877 | 2.21754 | 8.54314  | -3.74987 |
| N (16) | 1.19464 | 9.03340  | -2.96489 | 1.25996 | 9.11687  | -2.99253 |
| Fe(17) | 4.25110 | 11.20504 | -1.49078 | 4.28567 | 11.31233 | -1.48780 |
| N (18) | 4.34379 | 12.47046 | -3.00036 | 4.35393 | 12.59186 | -2.99707 |
| N (19) | 3.54581 | 13.31190 | -3.66978 | 3.55403 | 13.43225 | -3.65558 |
| N (20) | 4.26437 | 13.86126 | -4.64312 | 4.26016 | 13.98010 | -4.63183 |
| N (21) | 5.53677 | 13.39273 | -4.63045 | 5.52365 | 13.51497 | -4.62938 |
| C (22) | 5.54444 | 12.54240 | -3.60695 | 5.55090 | 12.66818 | -3.61191 |
| C (23) | 6.58724 | 11.69267 | -3.03676 | 6.60009 | 11.82102 | -3.06625 |
| N (24) | 6.04874 | 10.91411 | -2.06481 | 6.08055 | 11.03746 | -2.08774 |

| atom   | 100 K    |          |          | 300 K    |          |          |
|--------|----------|----------|----------|----------|----------|----------|
|        | x        | y        | z        | x        | y        | z        |
| C (25) | 6.81367  | 10.06334 | -1.38863 | 6.85247  | 10.17621 | -1.43741 |
| C (26) | 8.16728  | 9.91460  | -1.64585 | 8.19943  | 10.01586 | -1.72727 |
| C (27) | 8.71612  | 10.73050 | -2.62397 | 8.73000  | 10.81776 | -2.71259 |
| C (28) | 7.94119  | 11.64676 | -3.32270 | 7.94323  | 11.74248 | -3.39477 |
| N (29) | 6.09872  | 9.41616  | -0.38805 | 6.15748  | 9.52237  | -0.41753 |
| N (30) | 4.80647  | 9.85382  | -0.18267 | 4.86935  | 9.94774  | -0.19111 |
| C (31) | 4.39244  | 9.22815  | 0.91796  | 4.47996  | 9.31974  | 0.90533  |
| C (32) | 5.40925  | 8.39283  | 1.43049  | 5.50858  | 8.49537  | 1.40152  |
| C (33) | 6.47982  | 8.53419  | 0.59001  | 6.55162  | 8.64440  | 0.54875  |
| H (34) | -0.59399 | 10.69973 | -1.09950 | -0.54419 | 10.69981 | -1.06332 |
| H (35) | -0.85404 | 12.45276 | 0.43551  | -0.81915 | 12.41973 | 0.50489  |
| H (36) | 1.02474  | 13.63361 | 1.21539  | 1.02777  | 13.62272 | 1.28878  |
| H (37) | 3.37428  | 14.48508 | 1.99738  | 3.36262  | 14.52623 | 2.04343  |
| H (38) | 5.87732  | 14.62606 | 1.90333  | 5.85574  | 14.74774 | 1.93190  |
| H (39) | 6.63355  | 13.08690 | 0.09600  | 6.63717  | 13.21780 | 0.10633  |
| H (40) | 8.32558  | 12.22085 | -3.97565 | 8.31728  | 12.30240 | -4.06581 |
| H (41) | 9.64403  | 10.66092 | -2.81942 | 9.65169  | 10.73838 | -2.93157 |
| H (42) | 8.69520  | 9.28175  | -1.17410 | 8.73368  | 9.38018  | -1.26595 |
| H (43) | 7.32292  | 8.10455  | 0.66920  | 7.39800  | 8.21801  | 0.61272  |
| H (44) | 5.36096  | 7.84420  | 2.20435  | 5.47848  | 7.94660  | 2.17544  |
| H (45) | 3.53227  | 9.33037  | 1.30567  | 3.62200  | 9.41169  | 1.30506  |

**Table 8.** Cartesian coordinates (Å) of **1** calculated *in vacuo* for LS and HS.

|        | LS       |          |          | HS       |          |          |
|--------|----------|----------|----------|----------|----------|----------|
|        | x        | y        | z        | x        | y        | z        |
| C ( 1) | -0.08812 | 3.58756  | -2.02273 | -0.26884 | 3.61361  | -2.48983 |
| N ( 2) | 0.02649  | 2.26305  | -1.75169 | -0.03631 | 2.33567  | -2.09501 |
| N ( 3) | 0.11079  | 2.03979  | -0.41512 | 0.15086  | 2.25636  | -0.75876 |
| C ( 4) | 0.04967  | 3.23359  | 0.15324  | 0.03356  | 3.49668  | -0.31206 |
| C ( 5) | -0.07356 | 4.24692  | -0.81717 | -0.22959 | 4.39719  | -1.36199 |
| C ( 6) | 0.03788  | 1.13575  | -2.58706 | 0.01020  | 1.14994  | -2.85483 |
| N ( 7) | 0.14921  | 0.01675  | 1.88150  | 0.12872  | 0.06033  | -2.11343 |
| C ( 8) | 0.13657  | -1.19263 | -2.48098 | 0.20011  | -1.15669 | -2.68153 |
| C ( 9) | 0.04990  | -1.28495 | -3.86890 | 0.14972  | -1.29964 | -4.06910 |
| C (10) | -0.04282 | -0.10699 | -4.60206 | 0.02295  | -0.14980 | -4.83737 |
| C (11) | -0.05529 | 1.13907  | -3.97108 | -0.04566 | 1.11143  | -4.24258 |
| C (12) | 0.21037  | -2.23621 | -1.48735 | 0.33648  | -2.22099 | -1.71071 |
| N (13) | 0.19604  | -1.82955 | -0.20187 | 0.29004  | -1.92374 | -0.39917 |
| N (14) | 0.30216  | -2.91991 | 0.52817  | 0.49094  | -3.07330 | 0.22736  |
| N (15) | 0.37541  | -3.95444 | -0.28941 | 0.64860  | -4.02024 | -0.67145 |
| N (16) | 0.32011  | -3.55687 | -1.55903 | 0.55790  | -3.51519 | -1.90238 |
| Fe(17) | 0.14016  | 0.09962  | 0.02966  | -0.01474 | 0.12179  | 0.03553  |
| N (18) | -1.79324 | 0.14381  | 0.22573  | -2.00090 | 0.38442  | 0.59124  |
| N (19) | -2.87011 | 0.25957  | -0.52265 | -3.16016 | 0.63927  | -0.00370 |
| N (20) | -3.92013 | 0.31344  | 0.27648  | -4.09352 | 0.69167  | 0.91474  |
| N (21) | -3.54629 | 0.23569  | 1.55212  | -3.57409 | 0.47150  | 2.12682  |
| C (22) | -2.22407 | 0.13233  | 1.50334  | -2.28227 | 0.28554  | 1.90284  |
| C (23) | -1.19906 | 0.04373  | 2.51493  | -1.19424 | 0.03645  | 2.82764  |
| N (24) | 0.02131  | 0.07227  | 1.93874  | -0.00097 | 0.02721  | 2.21035  |

|        | LS       |          |          | HS       |          |          |
|--------|----------|----------|----------|----------|----------|----------|
|        | x        | y        | z        | x        | y        | z        |
| C (25) | 1.12730  | -0.04812 | 2.66309  | 1.10681  | -0.18925 | 2.89692  |
| C (26) | 1.10497  | -0.16739 | 4.04493  | 1.11242  | -0.41117 | 4.27007  |
| C (27) | -0.15277 | -0.17156 | 4.65239  | -0.12462 | -0.40393 | 4.91256  |
| C (28) | -1.31712 | -0.06948 | 3.89899  | -1.29711 | -0.17703 | 4.20057  |
| N (29) | 2.27015  | -0.03946 | 1.84909  | 2.26625  | 0.15437  | 2.09880  |
| N (30) | 2.07172  | 0.06921  | 0.51037  | 2.14078  | 0.16762  | 0.79450  |
| C (31) | 3.27624  | 0.02336  | -0.03640 | 3.36566  | 0.11218  | 0.29540  |
| C (32) | 4.27165  | -0.11433 | 0.95049  | 4.30310  | 0.24698  | 1.28213  |
| C (33) | 3.58979  | -0.15414 | 2.14289  | 3.55868  | -0.41193 | 2.42512  |
| H (34) | 0.04149  | -2.25994 | -4.34138 | 0.20654  | -2.28912 | -4.50698 |
| H (35) | -0.11918 | -0.15127 | -5.68395 | -0.02087 | -0.22610 | 5.91965  |
| H (36) | -0.14761 | 2.05804  | -4.53709 | -0.13239 | 2.00953  | -4.84167 |
| H (37) | -0.17556 | 3.95151  | -3.03476 | -0.45439 | 3.86489  | -3.52267 |
| H (38) | -0.14998 | 5.31096  | -0.65552 | -0.37991 | 5.46410  | 1.30251  |
| H (39) | 0.08494  | 3.31598  | 1.22991  | 0.13637  | 3.69412  | 0.74571  |
| H (40) | -2.30077 | -0.09051 | 4.35273  | -2.27201 | -0.16768 | 4.67341  |
| H (41) | -0.21708 | -0.26851 | 5.73162  | -0.16680 | -0.57743 | 5.98345  |
| H (42) | 2.01351  | -0.26690 | 4.62636  | 2.02898  | -0.58123 | 4.82161  |
| H (43) | 3.93500  | -0.25931 | 3.15979  | 3.84605  | -0.69829 | 3.42480  |
| H (44) | 5.33884  | 0.18364  | 0.80754  | 5.36872  | 0.37678  | 0.17253  |
| H (45) | 3.37873  | 0.07927  | -1.11047 | 3.52654  | 0.32450  | 0.75226  |

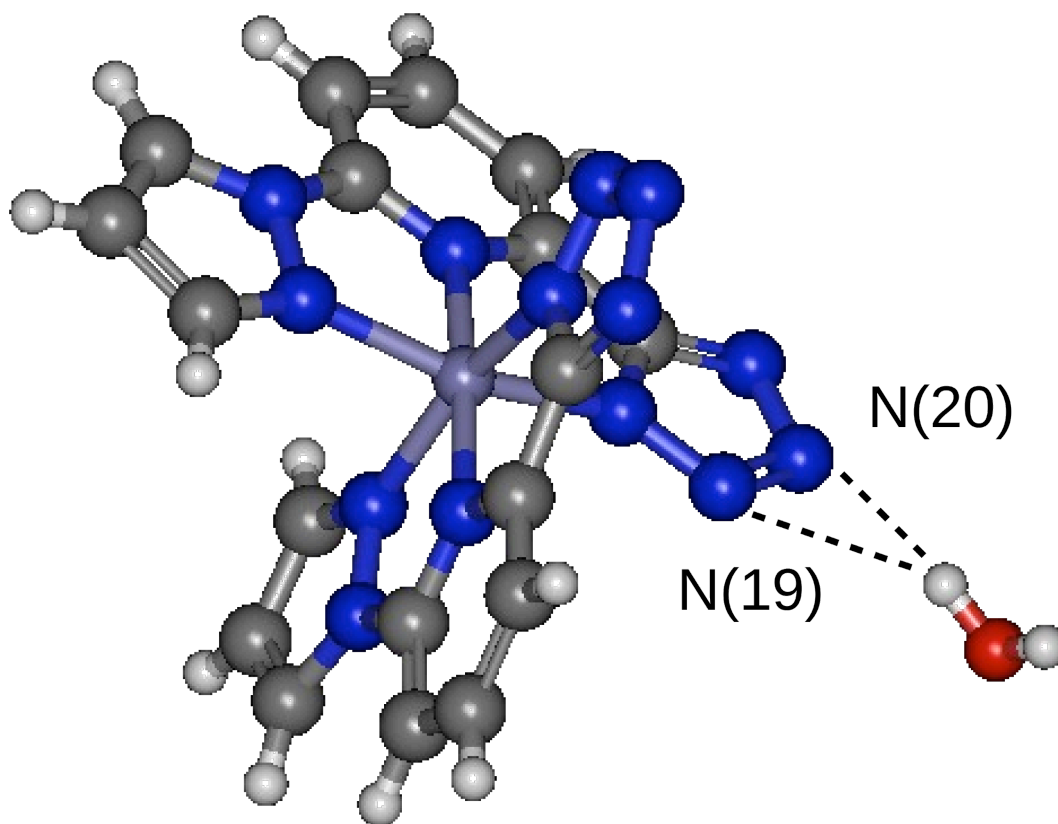

**Figure S4.** Hydrated complex in crystal **1**. N(20)-H = 2.10485 Å, N(19)-H = 2.63899 Å (drawn by Gabedit: A.R. Allouche, *J. Comput. Chem.*, 32, 174-182(2011)).

1. D. Gentili, N. Demitri, B. Schafer, F. Liscio, I. Bergenti, G. Ruani, M. Ruben and M. Cavallini, *Journal of Materials Chemistry C*, 2015, 3, 7836-7844.
